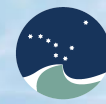

## Responses to changes in sprat abundance of common tern breeding numbers at 12 colonies in the Firth of Forth, east Scotland

Gemma Jennings<sup>1\*</sup>, Derek J. McGlashan<sup>2</sup>, and Robert W. Furness<sup>1</sup>

<sup>1</sup>College of Medical, Veterinary and Life Sciences, University of Glasgow, Graham Kerr Building, Glasgow G12 8QQ, UK

<sup>2</sup>School of Social and Environmental Sciences, University of Dundee, Dundee DD1 4HN, UK

\*Corresponding author: tel: +44 141 330 6648; fax: +44 141 330 5971; e-mail [g.jennings.1@research.gla.ac.uk](mailto:g.jennings.1@research.gla.ac.uk).

Jennings, G., McGlashan, D. J. and Furness, R. W. 2012. Responses to changes in sprat abundance of common tern breeding numbers at 12 colonies in the Firth of Forth, east Scotland. – ICES Journal of Marine Science, 69: 572–577.

Received 29 June 2011; accepted 20 January 2012; advance access publication 26 February 2012.

Breeding numbers collected in 12 common tern *Sterna hirundo* colonies in the Firth of Forth, Scotland, along with sprat landings data for the area, were used to investigate how the dynamics of a shared prey resource may affect different colonies in a region. Between 1969 and 2010, breeding numbers fluctuated much more at individual colonies than across the region as a whole, with the largest colonies showing opposite trends, suggesting relocation by birds. This indicates that data from individual colonies may be less useful than regional numbers when using seabirds as indicators. Tern breeding numbers in the region were reduced when the sprat stock (*Sprattus sprattus*) collapsed in the early 1980s after targeted fishing, but recovered during recent decades when the stock was unfished. This should be considered for reopening the Firth of Forth sprat fishery, as well as in the management of other shared prey stocks.

**Keywords:** ecosystem-based management, seabirds as indicators, *Sprattus sprattus*, *Sterna hirundo*.

### Introduction

Many of the world's fish stocks are considered to be fully fished or overfished (FAO, 2010), and for small pelagic fish, there is growing concern over the effects of stock depletion on top predators such as seabirds (Furness and Tasker, 2000; Gjørseter *et al.*, 2009). There is a need to understand how seabirds respond to prey stock depletion and to develop indicators for ecosystem management of fisheries taking account of the needs of top predators (Kabuta and Laane, 2003; Cury and Christensen, 2005; Livingston *et al.*, 2005). One such indicator might be breeding numbers of seabirds in colonies. There are clear examples of seabird population crashes resulting from the depletion of small pelagic prey fish stocks, particularly from upwelling areas of high productivity (Crawford *et al.*, 2007; Pichegru *et al.*, 2010) and simple foodwebs (Barrett and Krasnov, 1996; Frederiksen *et al.*, 2004; Gjørseter *et al.*, 2009). However, in many regions, the factors affecting seabird breeding population sizes are a complex mixture of top–down and bottom–up effects, and changes in breeding numbers can rarely be attributed with confidence to the depletion of specific prey-fish stocks (Mitchell *et al.*, 2004). In part, this is due to buffering in the life history of seabirds. As long-lived animals, seabirds may show strong responses of breeding success to reduced food

supply, but in poor years may abandon breeding to protect adult survival rates, which are the main driver of population change, thus maximizing lifetime reproductive success (Piatt *et al.*, 2007). There is also clear variation among seabird species in their responses to changes in food abundance (Furness and Tasker, 2000; Diamond and Devlin, 2003). Terns are particularly likely to experience breeding failure, to abandon breeding colonies, and to move between colonies within a region when food stocks are reduced (Becker and Ludwigs, 2004; Crawford, 2009), whereas many larger seabirds with greater foraging ranges are highly site-faithful even under adverse environmental conditions (Pichegru *et al.*, 2010). Terns are particularly sensitive to fluctuations in the abundance of small pelagic fish (Schaffner, 1986; Furness and Tasker, 2000; Mitchell *et al.*, 2004; Crawford, 2009; Dänhardt and Becker, 2011). Theory predicts that tern breeding success should show stronger responses to reductions in food supply than tern breeding numbers, since seabirds as long-lived animals buffer their survival against stresses of food shortage and will abandon breeding attempts (Monaghan, 1996; Becker and Ludwigs, 2004; Piatt *et al.*, 2007). However, breeding success of terns can also be strongly influenced by weather conditions and by predators (Becker and Specht, 1991; Furness and Tasker,

2000; Mitchell *et al.*, 2004). It has also been shown that common terns *Sterna hirundo* select which breeding colony they recruit into based on their experience as pre-breeders in the area (Dittmann *et al.*, 2005). As a result of both these processes, tern breeding success may be less clearly related to food abundance than breeding numbers.

There are many long-term datasets on the breeding success of seabirds, and, in some cases, these can be related to measured changes in abundance of their prey fish (Furness, 2007; Cury *et al.*, 2011; Dänhardt and Becker, 2011). Although there are some long-term datasets on the breeding numbers of seabirds at individual colonies (e.g. in Mitchell *et al.*, 2004), there are rather few datasets for all colonies within a specific region. It has been suggested that trends in breeding numbers may vary among colonies within particular regions (Mitchell *et al.*, 2004). If so, measures of the regional breeding population, rather than of individual colonies, are likely to be more appropriate to relate to changes in food abundance. Here, we examine changes in breeding numbers of common terns in the Firth of Forth region, east Scotland (Figure 1). There is a detailed time-series for the years 1969–2010 on breeding numbers in all the 12 colonies within this region. During this period, the abundance of their main prey in the Firth of Forth, the sprat *Sprattus sprattus* (Jennings *et al.*, 2010), though not assessed analytically, has changed considerably.

The sprat stock of the Firth of Forth was the target of a locally based reduction fishery (a fishery to manufacture fishmeal and oil) that harvested a total of 88 000 t between 1966 and 1980 (Marine Scotland Database). As mean sprat mass in this fishery was only a few grammes (Appendix 2 in Fernandez *et al.*, 2005), this is equivalent to tens of billions of fish, a large harvest from a relatively small sea area (93 km long with a 4655-km<sup>2</sup> drainage basin; Elliott and Neill, 2007). This fishery was mainly carried out by small boats from ports in Fife, on the north shore of the Firth of Forth, using light trawl gear (Fernandez *et al.*, 2005). After 1980, catches fell to extremely low levels as the stock collapsed (Fernandez *et al.*, 2005), and the fishery was progressively abandoned by local fishers in the early 1980s due to the lack of a profitable catch rate. It ceased completely in 1985. It has never reopened, although sprat abundance in the Firth of Forth has subsequently recovered (Fernandez *et al.*, 2005). There have been

many attempts since the late 1990s by local fishers to argue that sprat fishing in the Firth of Forth should be allowed to resume. To date, these have been rejected by the then Scottish Executive (now Scottish Government; <http://www.theyworkforyou.com/sp/?id=2005-10-27.20112.2>), and so the Firth of Forth sprat stock has been unfished for the last 25 years. The sprat fishery took only a trivial bycatch of juvenile herring *Clupea harengus* (Fernandez *et al.*, 2005), which are very rarely found in the diet of common terns in the Firth of Forth (Jennings *et al.*, 2010). Therefore, variations in herring abundance are unlikely to complicate the analysis of relationships between common terns and sprats in this region.

Here, we first test the hypothesis that tern numbers at individual colonies will vary much more than across the region as a whole, so that individual colony sizes are less suitable as indicators of seabird–fish stock relationships than the sum of all colonies within a region. Second, we test the hypothesis that breeding numbers of common terns in the Firth of Forth would decrease when the sprat stock collapsed after 1980, but would recover after sprats increased during the unfished period in recent years.

## Methods

### Long-term data: breeding common terns and sprat fishery

Seabird surveys of breeding numbers have been performed annually in the Firth of Forth since 1969. Data were obtained from the Forth Seabird Group database and the Joint Nature Conservation Committee's (JNCC) Seabird Monitoring Programme database for 12 sites in the Firth of Forth, listed from west to east: Grangemouth, Rosyth Dockyard, Port Edgar, Forth Rail Bridge, Inchmickery, Granton Harbour, Leith Docks, Long Craig Island, Aberlady Bay, Fidra, St. Baldred's Boat, and the Isle of May (Figure 1). Data were available from 1969 to 2010. There were several years with missing data for some sites, but usually it is likely that the site was not counted because breeding terns were absent or numbers were negligible. There are no unmonitored colonies within this region. The standard count unit is apparently occupied nests, which equates closely to breeding pairs (Walsh *et al.*, 1995).

Sprat has made up from 69 to more than 90% of the diet fed to chicks by breeding common terns in the Firth of Forth in recent years (Jennings *et al.*, 2010), so changes in sprat abundance will

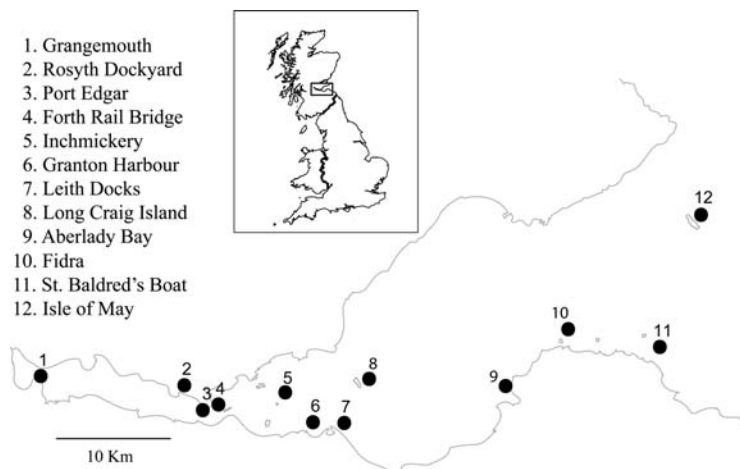

**Figure 1.** Map of the Firth of Forth, showing the locations of the 12 common tern colonies, numbered 1–12 from west to east.

be a critical factor for this tern population. Annual landing data (tonnes of sprat) dating back to 1960 were obtained from the Marine Scotland Database for the Firth of Forth (ICES rectangles 41E6 and 41E7). Data were for all vessels landing in Scotland and for all types of gear.

**Data analyses**

*Variation in common tern breeding numbers within and between colonies*

To test the hypothesis that tern numbers at individual colonies (Figure 2) will vary more than across the Firth of Forth region as a whole, the mean, variance, and coefficient of variation (CV) were calculated for numbers of breeding terns at each of the 12 colonies and for the whole region, for the period 1969–2010. We predicted that the CV would be lower for the whole Firth of Forth than for individual colonies. We then correlated breeding numbers at the four largest colonies (Leith Docks, Inchmickery, Aberlady Bay, and the Isle of May) across years to test whether numbers at different colonies followed similar patterns responding to changes in food abundance, showed independent dynamics, or showed inverse relationships. Inverse relationships would indicate a local redistribution of a total regional population that was likely to be food limited, in response to local changes in colony habitat quality.

*Relationship between common tern breeding numbers and the status of the sprat fishery*

Sprat stock biomass is difficult to measure, and ICES recently concluded that even at the scale of the North Sea, there were no reliable data on annual variations in sprat stock biomass (ICES, 2009). There are no analytical data on sprat stock biomass in the Firth of Forth (ICES, 2009). We cannot use annual sprat catch data as a proxy for sprat stock biomass, as catch varies in part as a function of effort. However, we can categorize years into periods of differing sprat stock status. When the fishery started, the sprat abundance was high, leading to large catches in 1969–1980 (Figure 3), so the period 1969–1980 was categorized as “harvest period”. Between 1981 and 1990, landings were greatly reduced and the fishery was eventually abandoned by local fishers due to the collapse of the sprat stock (Figure 3). This period was thus labelled “collapse”. The 10-year period 1991–2000 was labelled “initial

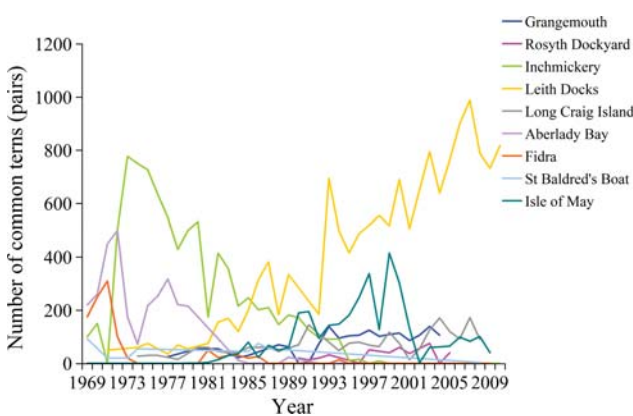

**Figure 2.** Numbers of breeding pairs of common terns each year from 1969 to 2010 at the nine largest colonies in the Firth of Forth [three further colonies (Granton, Port Edgar, and Forth Rail Bridge) that held on average fewer than ten pairs are not shown].

no-take period”; it is likely that the reduced sprat stock was in a state of recovery during this time, but there are no data to confirm this. However, after 2001, the stock had clearly recovered and fishers were lobbying to reopen the fishery, so we define this fourth period as “recent” and infer that sprat stock biomass was relatively high during this period. In summary, these periods, based on the inferred status of the sprat stock of the Firth of Forth, were defined as follows. (i) 1969–1980, “harvest period”; (ii) 1981–1990, “collapse”; (iii) 1991–2000, “initial no-take period”; and (iv) 2001–2010, “recent”. We compared common tern breeding numbers between these four periods. The response variable (numbers of breeding common terns) was overdispersed, so a generalized linear model with a quasipoisson distribution was applied to the data using the software package “R”.

**Results**

**Variation in common tern breeding numbers within and between colonies**

There was considerable interannual variation in numbers of breeding pairs at individual colonies, with some colonies being abandoned during the study period and other new colonies being formed. The CV in common tern breeding numbers at the 12 colonies in the Firth of Forth varied from 0.48 at Grangemouth to 3.37 at Granton Harbour (Table 1) with half of the colonies having a CV of >1. The CV for the entire Firth of Forth was much lower, at 0.31. Clearly the breeding population of the Firth of Forth was relatively more stable over the period 1969–2010 than were numbers at any single colony within the region.

Breeding numbers at individual colonies showed strong changes across years, with different or even contrasting trends between single colonies (Figure 2). Spearman’s correlations between numbers at the five largest colonies (Table 2) showed strong negative correlations between numbers breeding at Leith Docks and Inchmickery, the two largest colonies, and between numbers at Leith Docks and Aberlady Bay, the third largest colony. In contrast, numbers at Inchmickery and Aberlady Bay showed a strong positive correlation over the 42-year period.

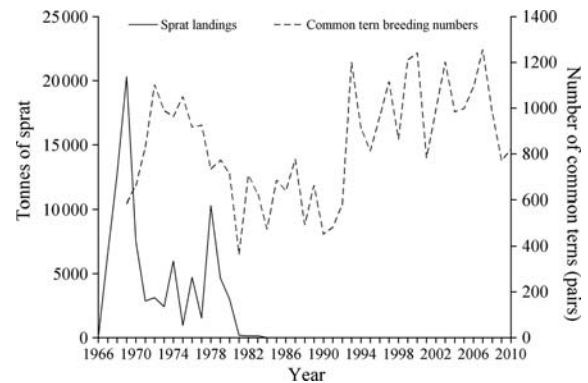

**Figure 3.** Sprat landings and numbers of breeding common terns in the Firth of Forth. Annual landings of sprats from the Firth of Forth fishery from 1966 to 2010. Data are for statistical rectangles 41E6 and 41E7 from Scottish Government Fisheries Management Database. Total catch of 88 000 t of clupeids, assessed as >98% sprat, <2% herring. Common tern numbers for each year are the sum of numbers of breeding pairs at each of the 12 colonies shown in Figure 1, for the years 1969 to 2010.

**Table 1.** Mean and CV in breeding numbers of common terns in the Firth of Forth at individual colonies (listed individually below from west to east; Figure 1) and for the whole area, from 1969 to 2010.

| Colony                | Mean  | CV   |
|-----------------------|-------|------|
| Grangemouth           | 82.3  | 0.48 |
| Rosyth                | 32.4  | 0.71 |
| Port Edgar            | 6.2   | 1.14 |
| Forth Rail Bridge     | 5.1   | 0.71 |
| Inchmickery           | 200.3 | 1.20 |
| Granton Harbour       | 1.3   | 3.37 |
| Leith Docks           | 407.1 | 0.73 |
| Long Craig Island     | 73.7  | 0.56 |
| Aberlady Bay          | 113.0 | 1.35 |
| Fidra                 | 37.4  | 2.10 |
| St Baldred's Boat     | 40.7  | 0.78 |
| Isle of May           | 82.7  | 1.23 |
| Firth of Forth region | 822.8 | 0.31 |

**Table 2.** Spearman's correlations between numbers of common terns nesting at the four largest colonies in the Firth of Forth from 1969 to 2010.

| Colony       | Inchmickery | Aberlady Bay | Isle of May | Fidra  |
|--------------|-------------|--------------|-------------|--------|
| Leith Docks  | -0.81*      | -0.83*       | 0.72*       | -0.24  |
| Inchmickery  |             | 0.59*        | -0.62*      | 0.03   |
| Aberlady Bay |             |              | -0.87*      | 0.42   |
| Isle of May  |             |              |             | -0.38* |

Significant correlations are denoted by an asterisk ( $p < 0.05$ ).

Numbers at Leith Docks and the Isle of May showed a positive correlation over this period (Table 2).

### Relationship between common tern breeding numbers and the status of the sprat fishery

Across the region as a whole, there was a significant difference between numbers of breeding pairs of common terns present during the "harvest period", "initial no-take period", and "recent" periods compared with the "collapse" period, with smaller numbers of breeding pairs of common terns during the "collapse" (Figure 4; ANOVA,  $F = 9.5947$ , d.f. = 3,  $p < 0.0001$ ). During the early presence of the fishery, common tern breeding numbers initially showed an increase from 587 pairs in 1969 to 1110 in 1972. After this, landings declined (apparently due to a sprat stock collapse within the region) and the sprat fishery was closed by 1985. This collapse was followed by a period of reduced common tern numbers throughout the 1980s. Eight years after the closure of the sprat fishery, in 1993, the common tern population increased and has remained at large numbers ever since.

## Discussion

### Variation in common tern breeding numbers within and between colonies

There was a considerably lower CV in numbers of common tern pairs in the whole of the Firth of Forth compared to numbers at individual colonies (whether large or small), indicating that numbers at individual colonies varied much more than the total population of the region. Based on the strong negative correlations

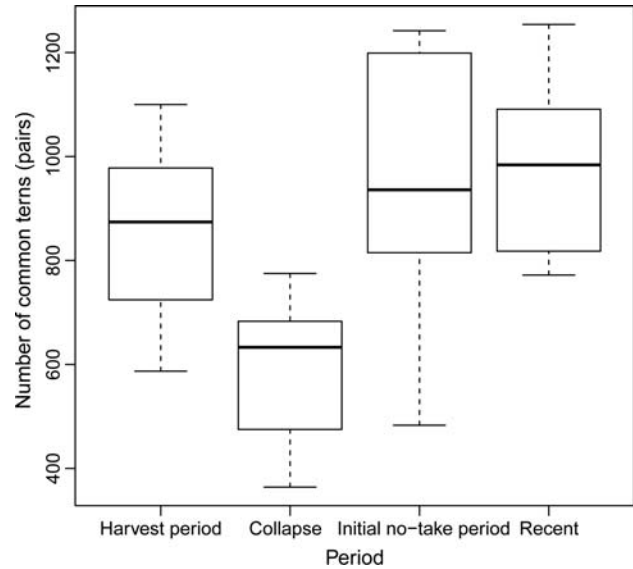

**Figure 4.** Numbers of common terns in the Firth of Forth over four periods: (i) 1969–1980, "harvest period"; (ii) 1981–1990, "collapse"; (iii) 1991–2000, "initial no-take period"; and (iv) 2001–2010, "recent". The median values of the data are indicated within each box, with the lower and upper edges indicating the 25th and 75th percentiles, respectively. Whiskers show the minimum and maximum data values.

between breeding numbers at the largest colonies, we refute the hypotheses that numbers vary independently among colonies and that numbers at each colony respond similarly across years to changes in abundance of their main food, the Firth of Forth sprat stock. We propose that the strong negative correlations between the largest colonies indicate a redistribution of the Firth of Forth breeding population of common terns from one colony to another, either as a result of large differences in recruitment or as a result of the movement of adults between sites. Numbers fluctuate at individual colonies for a wide variety of reasons, which include local effects of predators, food shortage, human disturbance, exposure to weather extremes, and local environmental change (Becker and Specht, 1991; Craik, 1992, 1997; Becker and Ludwigs, 2004; Forrester *et al.*, 2007). Terns are particularly sensitive to impacts of gulls, which eat eggs and chicks as well as displacing terns from nesting habitat (Eggeling, 1974; Forrester *et al.*, 2007). Within the Firth of Forth, common terns abandoned the Isle of May during the 1950s as gull numbers increased (Eggeling, 1974). After extensive culling of gulls at that site, common terns returned to the Isle of May in 1979, though the colony has never regained its status of the 1940s, as the largest common tern colony in the region (Wanless, 1988).

### Relationship between common tern breeding numbers and the status of the sprat fishery

Long-term data for common terns breeding at all sites in the Firth of Forth show that overall numbers fluctuated considerably between 1969 and 2010. A comparison of tern breeding numbers across four fishery periods supports the hypothesis that breeding numbers would decrease when the sprat stock collapsed after 1980 but would recover after sprats increased during the recent unfished period. During the initial presence of the sprat



fishery, common tern numbers showed an increase. But when the sprat stock collapsed in the 1980s, tern numbers declined. Following the collapse and subsequent fishery closure, the number of common terns in the Firth of Forth remained considerably reduced for a 10-year period. The state of the sprat stock during this post-fishery period is unknown, but it is likely that the sprat population would have required a number of years to recover to unfished levels of abundance (Hutchings, 2000; Worm *et al.*, 2009; Hammer *et al.*, 2010; Murawski, 2010). Subsequent stock growth, even in the absence of a fishery may be slow, requiring a considerable recovery period (Worm *et al.*, 2009; Hammer *et al.*, 2010; Murawski, 2010). In 1993, the tern population increased and since then has been higher than it was during the fishery or during the 10-year period that followed the collapse of the sprat stock. The data clearly show that tern numbers were reduced in the region when sprat abundance was too low to sustain a fishery and that numbers subsequently recovered to be similar to numbers before the sprat stock collapse. These data indicate that while breeding numbers at individual colonies fluctuated considerably, the total population of the region changed in relation to the inferred variations in sprat abundance. Although sprat catch data do not act as a proxy for annual stock biomass, the change from an abundant stock supporting a fishery in 1969–1980 (“harvest period”) to a collapsed stock in 1981–1990 with very low catch represents a large qualitative change in status with consequences for terns. Such major changes in key food fish stocks, with consequent impacts on seabirds, are not uncommon and have been described in the North Sea (sandeels *Ammodytes marinus*; Furness and Tasker, 2000; Frederiksen *et al.*, 2004), the Wadden Sea (sprat and herring *C. harengus*; Dänhardt and Becker, 2011), the Barents Sea (capelin *Mallotus villosus*; Barrett and Krasnov, 1996; Gjørseter *et al.*, 2009), and the Benguela ecosystem in southern Africa (anchovy *Engraulis encrasicolus*; Crawford *et al.*, 2007).

## Conclusions

The high concentration of common terns at Leith Docks in recent years is an interesting move by the birds to nest in an industrial site where both predation risk and human disturbance exist, but currently at low levels (Jennings *et al.*, 2010). We suggest that numbers at individual colonies are strongly affected particularly by local influences of predation, whereas numbers in the region as a whole are more strongly influenced by food supply. Dänhardt and Becker (2011) showed that breeding success of common terns at colonies in the Wadden Sea correlated with annual estimates of North Sea herring recruitment and Wadden Sea sprat abundance. However, at some common tern colonies, impacts of predation can be so severe that any relationship with food supply is completely obscured by catastrophic breeding failures caused by predators (e.g. Eggeling, 1974; Craik, 1997; Forrester *et al.*, 2007; Dänhardt and Becker, 2011). We suggest that, in regions where food supply is good but some colonies are affected by predators, common terns will readily relocate or will recruit predominantly into colonies where predation impacts are absent or small (Dittmann *et al.*, 2005). Such behaviour will result in regional breeding numbers showing closer relationships with forage fish abundance and individual colony sizes being driven more by local predation impacts. This has important implications for seabird monitoring studies and conservation and should be considered when using seabirds as indicators. With the implementation of policies such as the EU Marine Strategy Framework

Directive, there is now an increased need to establish appropriate indicators, and consideration of regional seabird breeding numbers is of particular relevance to ecosystem-based management of shared fish stocks. Future research should carefully consider the dynamics of individual colonies when evaluating how generally applicable conclusions drawn from single or a small number of seabird colonies may be for management on a broader scale.

Currently, there is no sprat fishery in the Firth of Forth but the sprat stock is now considered to be at a high level (<http://www.theyworkforyou.com/sp/?id=2005-10-27.20112.2>). Any assessments considering the reopening of the Firth of Forth sprat fishery clearly should consider the potential impact that changes in sprat abundance may have on dependent predators in the region, in particular the population of common terns since the largest colony, at Leith Docks (now holding about 90% of the Firth of Forth population), is protected under European Law as a Special Protection Area for common terns.

## Acknowledgements

We thank Dr Paul Fernandes at Marine Scotland for providing sprat catch data for the Firth of Forth from the Scottish Government Fisheries Management Database and the Joint Nature Conservation Committee and Forth Seabird Group for data on breeding numbers of common terns. The corresponding author conducted this research while being funded by a studentship from Forth Ports Limited. We thank two anonymous referees for helpful advice on revising the MS.

## References

- Barrett, R. T., and Krasnov, Y. V. 1996. Recent responses to changes in stocks of prey species by seabirds breeding in the southern Barents Sea. *ICES Journal of Marine Science*, 53: 713–722.
- Becker, P. H., and Ludwigs, J-D. 2004. *Sterna hirundo* common tern. BWP Update, 6: 91–137.
- Becker, P. H., and Specht, R. 1991. Body mass fluctuations and mortality in common tern *Sterna hirundo* chicks dependent on weather and tide in the Wadden Sea. *Ardea*, 79: 45–56.
- Craik, J. C. A. 1992. Exceptional mortality of auks, terns and kittiwakes *Rissa tridactyla* in west Scotland in July 1985. *Sula*, 6: 125–138.
- Craik, J. C. A. 1997. Long-term effects of North American mink *Mustela vison* on seabirds in western Scotland. *Bird Study*, 44: 303–309.
- Crawford, R. J. M. 2009. A recent increase of swift terns *Thalasseus bergii* off South Africa—the possible influence of an altered abundance and distribution of prey. *Progress in Oceanography*, 83: 398–403.
- Crawford, R. J. M., Dundee, B. L., Dyer, B. M., Klages, N. T. W., Meyer, M. A., and Upfold, L. 2007. Trends in numbers of Cape gannets (*Morus capensis*), 1956/1957–2005/2006, with a consideration of the influence of food and other factors. *ICES Journal of Marine Science*, 64: 169–177.
- Cury, P. M., Boyd, I., Bonhommeau, S., Anker-Nilssen, T., Crawford, R. J. M., Furness, R. W., Mills, J. A., *et al.* 2011. Global seabird response to forage fish depletion—one-third is for birds. *Science*, 334: 1703–1706.
- Cury, P. M., and Christensen, V. 2005. Quantitative ecosystem indicators for fisheries management: introduction. *ICES Journal of Marine Science*, 62: 307–310.
- Dänhardt, A., and Becker, P. H. 2011. Herring and sprat abundance indices predict chick growth and reproductive performance of common terns breeding in the Wadden Sea. *Ecosystems*, 14: 791–803.

- Diamond, A. W., and Devlin, C. M. 2003. Seabirds as indicators of changes in marine ecosystems. Ecological monitoring on Machias Seal Island. Environmental Monitoring and Assessment, 88: 153–175.
- Dittmann, T., Zinsmeister, D., and Becker, P. H. 2005. Dispersal decisions: common terns, *Sterna hirundo*, choose between colonies during prospecting. Animal Behaviour, 70: 13–20.
- Eggeling, W. J. 1974. The birds on the Isle of May—a revised assessment of status. Scottish Birds, 8(Suppl.): 93–148.
- Elliott, A. J., and Neill, S. P. 2007. The tidal flux in the Firth of Forth. Proceedings of the Institution of Civil Engineers: Maritime Engineering, 160: 25–32.
- FAO. 2010. The State of World Fisheries and Aquaculture 2010. FAO, Rome. 197 pp. <http://www.fao.org/docrep/013/i1820e/i1820e.pdf>.
- Fernandez, T. F., Hollywood, C., Huxham, M., and Kinross, J. 2005. Sprat survey of the Firth of Forth, December 2004. Commissioned by Fife Council, Napier University.
- Forrester, R. W., Andrews, I. J., McInerny, C. J., Murray, R. D., McGowan, R. Y., Zonfrillo, B., Betts, M. W., *et al.* (Eds). 2007. The Birds of Scotland. The Scottish Ornithologists' Club, Aberlady.
- Frederiksen, M., Wanless, S., Harris, M. P., Rothery, P., and Wilson, L. J. 2004. The role of industrial fisheries and oceanographic change in the decline of North Sea black-legged kittiwakes. Journal of Applied Ecology, 41: 1129–1139.
- Furness, R. W. 2007. Responses of seabirds to depletion of food fish stocks. Journal of Ornithology, 148 (supp. 2): s247–s252.
- Furness, R. W., and Tasker, M. L. 2000. Seabird-fishery interactions: quantifying the sensitivity of seabirds to reductions in sandeel abundance and identification of key areas for sensitive seabirds in the North Sea. Marine Ecology Progress Series, 202: 253–264.
- Gjøsæter, H., Bogstad, B., and Tjelmeland, S. 2009. Ecosystem effects of the three capelin stock collapses in the Barents Sea. Marine Biology Research, 5: 40–53.
- Hammer, C., Kjesbu, O. S., Kruse, G. H., and Shelton, P. A. 2010. Rebuilding depleted fish stocks: biology, ecology, social science, and management strategies. ICES Journal of Marine Science, 67: 1825–1829.
- Hutchings, J. A. 2000. Collapse and recovery of marine fishes. Nature, 406: 882–885.
- ICES. 2009. Report of the Benchmark Workshop on Short-Lived Species (WKSHORT). ICES Document CM 2009/ACOM: 34.
- Jennings, G., Furness, R. W., and McGlashan, D. J. 2010. Ecology of an urban common tern colony in Leith Docks, Scotland. Poster presented at 1st World Seabird Conference, Victoria, Canada, 7–11 September.
- Kabuta, S. H., and Laane, R. W. P. M. 2003. Ecological performance indicators in the North Sea: development and application. Ocean and Coastal Management, 46: 277–297.
- Livingston, P. A., Aydin, K., Boldt, J., Ianelli, J., and Jurado-Molina, J. 2005. A framework for ecosystem impacts assessment using an indicator approach. ICES Journal of Marine Science, 62: 592–597.
- Mitchell, P. I., Newton, S. F., Ratcliffe, N., and Dunn, T. E. 2004. Seabird Populations of Britain and Ireland. T. & A.D. Poyser, London.
- Monaghan, P. 1996. Relevance of the behaviour of seabirds to the conservation of marine environments. Oikos, 77: 227–237.
- Murawski, S. A. 2010. Rebuilding depleted fish stocks: the good, the bad, and, mostly, the ugly. ICES Journal of Marine Science, 67: 1830–1840.
- Piatt, J. F., Harding, A. M. A., Schultz, M., Speckman, S. G., van Pelt, T. I., Drew, G. S., and Kettle, A. B. 2007. Seabirds as indicators of marine food supplies: cairns revisited. Marine Ecology Progress Series, 352: 221–234.
- Pichegru, L., Ryan, P. G., Crawford, R. J. M., van der Lingen, C. D., and Grémillet, D. 2010. Behavioural inertia places a top marine predator at risk from environmental change in the Benguela upwelling system. Marine Biology, 157: 537–544.
- Schaffner, F. C. 1986. Trends in elegant tern and northern anchovy populations in California. Condor, 88: 347–354.
- Walsh, P. M., Halley, D. J., Harris, M. P., del Nevo, A., Sim, I. M. W., and Tasker, M. L. 1995. Seabird Monitoring Handbook for Britain and Ireland. Joint Nature Conservation Committee, Peterborough.
- Wanless, S. 1988. The re-colonisation of the Isle of May by common and Arctic terns. Scottish Birds, 15: 1–8.
- Worm, B., Hilborn, R., Baum, J. K., Branch, T. A., Collie, J. S., Costello, C., Fogarty, M. J., *et al.* 2009. Rebuilding global fisheries. Science, 325: 578–585.

Handling editor: Rochelle Seitz
